# Supplementary material for: Kinetics of oligomer-forming reactions involving the major functional groups present in atmospheric secondary organic aerosol particles
Source: Royal Society of Chemistry journal article supplement (doi:10.1039/d2em00124a), 2022-06-01
Supplement: d2em00124a1.pdf [file d2em00124a1.pdf]

## **Supplementary Information**

### **Kinetics of Oligomer-Forming Reactions Involving the Major Functional Groups Present in Atmospheric Secondary Organic Aerosol Particles**

Hannah K. Maben and Paul J. Ziemann

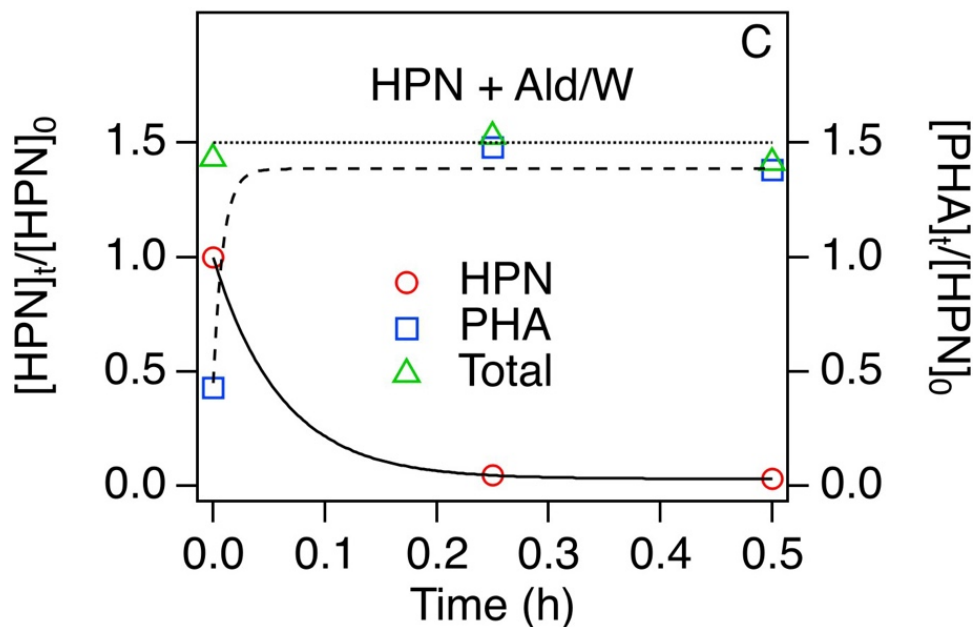

Figure S1. Time profile of the ratio  $[HPN]_t/[HPN]_0$ , the ratio of the PHA product  $[PHA]_t/[HPN]_0$ , and the sum of the ratios, for reaction of HPN with nonanal (Ald) in a phase-separated organic/aqueous mixture with the aqueous phase being water (W). The time period has to narrowed to 0 to 0.5 h from the 0 to 24 h time period shown in Figure 4B.

Table S1. Summary of results from all experiments with the four different probe molecules.

| Probe | Excess reactant       | Catalyst                               | Major product    | Equilibrium constant (K <sub>eq</sub> ) | Forward rate constant (k <sub>f</sub> ) | Reverse rate constant (k <sub>r</sub> ) |
|-------|-----------------------|----------------------------------------|------------------|-----------------------------------------|-----------------------------------------|-----------------------------------------|
| HPN   | 3-decanone            | none                                   | peroxyhemiketal  | no reaction                             | no reaction                             | no reaction                             |
| HPN   | 3-decanone            | 3.0 M H <sub>2</sub> SO <sub>4</sub>   | peroxyhemiketal  | no reaction                             | no reaction                             | no reaction                             |
| HPN   | nonanal               | none                                   | peroxyhemiacetal | 4 M <sup>-1</sup>                       | >1.5 M <sup>-1</sup> h <sup>-1</sup>    | >0.24 M <sup>-1</sup> h <sup>-1</sup>   |
| CN    | 1-octanol             | none                                   | ester            | no reaction                             | no reaction                             | no reaction                             |
| CN    | 1-octanol             | 0.005 M H <sub>2</sub> SO <sub>4</sub> | ester            | n/a                                     | 5.9 M <sup>-2</sup> h <sup>-1</sup>     | no reaction                             |
| CN    | 1-octanol             | 3.0 M H <sub>2</sub> SO <sub>4</sub>   | ester            | 2.9                                     | 0.068 M <sup>-2</sup> h <sup>-1</sup>   | 0.023 M <sup>-2</sup> h <sup>-1</sup>   |
| HN    | 5-hydroxy-2-pentanone | none                                   | acetal           | no reaction                             | no reaction                             | no reaction                             |
| HN    | 5-hydroxy-2-pentanone | 3.0 M H <sub>2</sub> SO <sub>4</sub>   | acetal           | no reaction                             | no reaction                             | no reaction                             |
| HN    | 6-hydroxy-5-decanone  | none                                   | hemiketal        | no reaction                             | no reaction                             | no reaction                             |
| HN    | 6-hydroxy-5-decanone  | 3.0 M H <sub>2</sub> SO <sub>4</sub>   | hemiketal        | no reaction                             | no reaction                             | no reaction                             |
| HN    | 1-octanol             | 3.0 M H <sub>2</sub> SO <sub>4</sub>   | ether            | no reaction                             | no reaction                             | no reaction                             |
| HN    | HN                    | 3.0 M H <sub>2</sub> SO <sub>4</sub>   | ether            | no reaction                             | no reaction                             | no reaction                             |
| βHN   | βCN                   | none                                   | hemiketal        | no reaction                             | no reaction                             | no reaction                             |
| βHN   | βCN                   | 3.0 M H <sub>2</sub> SO <sub>4</sub>   | hemiketal        | no reaction                             | no reaction                             | no reaction                             |
| βCN   | 1,2-octanediol        | none                                   | hemiketal        | no reaction                             | no reaction                             | no reaction                             |
| βCN   | 1,2-octanediol        | 3.0 M H <sub>2</sub> SO <sub>4</sub>   | hemiketal        | no reaction                             | no reaction                             | no reaction                             |
| βCN   | 1-octanol             | none                                   | hemiketal        | no reaction                             | no reaction                             | no reaction                             |
| βCN   | 1-octanol             | 3.0 M H <sub>2</sub> SO <sub>4</sub>   | hemiketal        | no reaction                             | no reaction                             | no reaction                             |
| βCN   | α-pinene SOA          | none                                   | hemiketal        | no reaction                             | no reaction                             | no reaction                             |
| βCN   | α-pinene SOA          | 3.0 M H <sub>2</sub> SO <sub>4</sub>   | hemiketal        | no reaction                             | no reaction                             | no reaction                             |
| CN    | α-pinene SOA          | none                                   | Ester            | no reaction                             | no reaction                             | no reaction                             |
| CN    | α-pinene SOA          | 3.0 M H <sub>2</sub> SO <sub>4</sub>   | Ester            | no reaction                             | no reaction                             | no reaction                             |
